# Supplementary material
Source: MDPI journal article supplement (https://www.mdpi.com/2071-1050/13/2/692)
Supplement: s1 [file s1]

## Sheet: Data
No.	Refence no.	Title	Year	Journal	Country - Experiment	Country - First Author	IT	Technology 1	Technology 2	Variable type captured	Variable level	IT stage	Pig production stage	Biomarker category 1	Biomarker name 1	Biomarker property 1	Biomarker category 2	Biomarker name 2	Biomarker property 2	Welfare issue studied	Evaluation method	Good Feeding			Good Housing				Good Health				Appropriate behaviour
																						All	Absence of prolonged hunger	Absence of prolonged thirst	All	Comfort around resting	Thermal comfort	Ease of movement	All	Absence of injuries	Absence of diseases	Absence of pain induced by MP	All	Expression of social behaviour	Expression of other behavior	Good human-animal relationship	Positive emotional state
1	78	Preliminary trials of a sound-activated device to reduce crushing of piglets by sows	1989	Applied Animal Behaviour Science	USA	USA	Prevention of piglet crushing	Sound, microphone	Electrode belt	Target Variable	Pen	IT implementation	Piglets	Animal measure	Squeals	Behavioural	/	/	/	Piglet crushing	Real-time	0	0	0	0	0	0	0	1	1	1	0	0	0	0	0	0
2	23	Neural network analysis of postural behavior of young swine to determine the IR thermal comfort state	1997	Transactions of the American Society of Agricultural Engineers	USA	USA	Classification of thermal comfort behaviour	Image, 2D camera	/	Both	Pen	IT development	Weaners	Animal measure	Resting posture	Behavioural	/	/	/	Thermal environmental control	Real-time	0	0	0	1	0	1	0	0	0	0	0	0	0	0	0	0
3	24	Assessing swine thermal comfort by image analysis of postural behaviors	1999	Journal of Animal Science	USA	USA	Classification of thermal comfort behaviour	Image, 2D camera	/	Both	Pen	IT development	Weaners	Animal measure	Resting posture	Behavioural	/	/	/	Thermal environmental control	Real-time	0	0	0	1	0	1	0	0	0	0	0	0	0	0	0	0
4	25	Image-processing algorithms for behavior analysis of group-housed pigs	2000	Behaviour Research Methods, Instruments and Computers	USA	USA	Selection and segmentation of postural images	Image, 2D camera	/	Feature variable	Laboratory	IT development	Artificial	Animal measure	Resting posture	Behavioural	/	/	/	Thermal environmental control	Real-time	0	0	0	1	0	1	0	0	0	0	0	0	0	0	0	0
5	74	Linear prediction coding analysis and self-organizing feature map as tools to classify stress calls of domestic pigs (Sus scrofa)	2001	Journal of Acoustical Society of America	Germany	Germany	Scream classification	Sound, microphone	/	Feature variable	Laboratory	IT development	Piglets, Weaners	Animal measure	Scream	Behavioural	/	/	/	Stress	Real-time	0	0	0	0	0	0	0	0	0	0	0	1	0	0	0	1
6	70	Fuzzy approach for improved recognition of citric acid induced piglet coughing from continuous registration	2003	Journal of Sound and Vibration	Belgium	Belgium	Cough classification	Sound, microphone	/	Feature variable	Laboratory	IT development	Piglets	Animal measure	Cough	Behavioural	/	/	/	Respiratory disease	Real-time	0	0	0	0	0	0	0	1	0	1	0	0	0	0	0	0
7	79	Automated recording of stress vocalisations as a tool to document impaired welfare in pigs	2004	Animal Welfare	Germany	Germany	Stress vocalisation classification	Sound, microphone	/	Feature variable	Pen	IT development and validation	Piglets, Weaners, Finishers	Animal measure	Vocalisation	Behavioural	/	/	/	Stress	Real-time	0	0	0	0	0	0	0	0	0	0	0	1	0	0	0	1
8	110	A model for monitoring the condition of young pigs by their drinking behaviour	2005	Computers and Electronics in Agriculture	Denmark	Denmark	Monitor pig condition by measuring water intake	Water flow-meter	/	Feature variable	Batch	IT development	Weaners	Animal measure	Water intake	Behavioural	/	/	/	General	Real-time	0	0	0	0	0	0	0	1	0	1	0	0	0	0	0	0
9	75	Castration-induced vocalisation in domestic piglets, Sus scrofa: Complex and specific alterations of the vocal quality	2005	Applied Animal Behaviour Science	Germany	Germany	Stress vocalisation classification during castration	Sound, microphone	/	Feature variable	Individual	IT development	Piglets	Animal measure	Scream	Behavioural	/	/	/	Castration	Real-time	0	0	0	0	0	0	0	1	0	0	1	0	0	0	0	0
10	26	A real-time computer vision assessment and control of thermal comfort for group-housed pigs	2008	Computers and Electronics in Agriculture	USA	USA	Classification of thermal comfort behaviour	Image, 2D camera	/	Both	Pen	IT development	Weaners	Animal measure	Resting posture	Behavioural	/	/	/	Thermal environmental control	Real-time	0	0	0	1	0	1	0	0	0	0	0	0	0	0	0	0
11	88	Classifying sows' activity types from acceleration patterns. An application of the Multi-Process Kalman Filter	2008	Applied Animal Behaviour Science	Denmark	Denmark	Activity type classification	Accelerometer (Neck collar)	/	Feature variable	Individual	IT development	Group-housed sows	Animal measure	Feeding, rooting, walking, lying	Behavioural	/	/	/	General	Real-time	1	1	0	1	0	0	1	1	0	1	0	1	0	1	0	0
12	71	Cough localization for the detection of respiratory diseases in pig houses	2008	Computers and Electronics in Agriculture	Italy	Belgium	Cough localisation	Sound, microphone	/	Feature variable	Pen	IT development	Finishers	Animal measure	Cough	Behavioural	/	/	/	Respiratory disease	Real-time	0	0	0	0	0	0	0	1	0	1	0	0	0	0	0	0
13	80	Differential vocal responses to physical and mental stressors in domestic pigs (Sus scrofa)	2008	Applied Animal Behaviour Science	Germany	Germany	Stressor quality classification	Sound, microphone	/	Feature variable	Laboratory	IT development	Weaners	Animal measure	Vocalisation	Behavioural	/	/	/	Stress, physical and mental	Real-time	0	0	0	0	0	0	0	0	0	0	0	1	0	0	0	1
14	81	Real time computer stress monitoring of piglets using vocalization analysis	2008	Computers and Electronics in Agriculture	Brazil	Brazil	Stress vocalisation classification	Sound, microphone	/	Feature variable	Laboratory	IT development	Piglets	Animal measure	Vocalisation	Behavioural	/	/	/	Stress	Real-time	0	0	0	0	0	0	0	0	0	0	0	1	0	0	0	1
15	72	Real-time recognition of sick pig cough sounds	2008	Computers and Electronics in Agriculture	Belgium	UK	Sick cough classification	Sound, microphone	/	Feature variable	Laboratory	IT development	Weaners, Finishers	Animal measure	Cough	Behavioural	/	/	/	Respiratory disease	Real-time	0	0	0	0	0	0	0	1	0	1	0	0	0	0	0	0
16	27	An automatic colour-based computer vision algorithm for tracking the position of piglets	2009	Spanish Journal of Agricultural Research	Spain	Spain	Pig position	Image, 2D camera	/	Feature variable	Individual	IT development	Piglets	Animal measure	Position	Behavioural	/	/	/	General	Real-time	0	0	0	1	0	1	0	0	0	0	0	0	0	0	0	0
17	73	Time-series analysis for online recognition and localization of sick pig (Sus scrofa) cough sounds	2009	Journal of Acoustical Society of America	Italy	Belgium	Sick cough recognition and localisation	Sound, microphone	/	Feature variable	Pen	IT development and validation	Weaners, Finishers	Animal measure	Cough	Behavioural	/	/	/	Respiratory disease	Real-time	0	0	0	0	0	0	0	1	0	1	0	0	0	0	0	0
18	89	Classification of sows' activity types from acceleration patterns using univariate and multivariate models	2010	Computers and Electronics in Agriculture	Denmark	Denmark	Activity type classification	Accelerometer (Neck collar)	/	Feature variable	Individual	IT development	Group-housed sows	Animal measure	Feeding, rooting, walking, lying	Behavioural	/	/	/	General	Real-time	1	1	0	1	0	0	1	1	0	1	0	1	0	1	0	0
19	20	Validation and fine-tuning of a predictive model for air quality inlivestock buildings	2010	Biosystems Engineering	Australia	Australia	Air quality prediction	EMK	/	Feature variable	Batch	IT development	Piglets, Weaners, Finishers, Sows	Environmental measure	Temperature, RH, Airspeed, CO2, NH3, Airborne particles, Microorganisms, Endotoxins, Ventilation rate	/	/	/	/	Air quality	Real-time	0	0	0	0	0	0	0	1	0	1	0	0	0	0	0	0
20	82	Efficiency of distinct data mining algorithms for classifying stress level in piglets from their vocalization	2012	Engenharia Agricola	Brazil	Brazil	Stress level classification	Sound, microphone	/	Feature variable	Individual	IT development	Piglets	Animal measure	Vocalisation	Behavioural	/	/	/	Stress during castration	Real-time	0	0	0	0	0	0	0	1	0	0	1	0	0	0	0	0
21	31	Development of a system for automatic measurements of force and visual stance variables for objective lameness detection in sows: SowSIS	2013	Biosystems Engineering	Belgium	Belgium	Automatic measurements of force and visual stance variables	Force plate	Image, 2D camera	Feature variable	Individual	IT development	Individual sows	Animal measure	Force stance variables	Behavioural	Animal measure	Visual stance variables	Behavioural	Lameness	Real-time	0	0	0	0	0	0	0	1	1	0	0	0	0	0	0	0
22	53	The automatic monitoring of pigs water use by cameras	2013	Computers and Electronics in Agriculture	Belgium	Belgium	Water use monitoring	Video, 2D camera	/	Feature variable	Pen	IT development	Weaners, Finishers	Animal measure	Drinker visit time	Behavioural	/	/	/	General	Real-time	1	0	1	0	0	0	0	1	0	1	0	0	0	0	0	0
23	83	Understanding vocalization might help to assess stressful conditions in piglets	2013	Animals	Brazil	Brazil	Stress vocalisation classification	Sound, microphone	/	Feature variable	Laboratory	IT development	Piglets	Animal measure	Vocalisation	Behavioural	/	/	/	Handling, cold and hunger	Real-time	1	1	0	1	0	1	0	1	1	0	0	0	0	0	0	0
24	44	Automated video analysis of pig activity at pen level highly correlates to human observations of behavioural activities	2014	Livestock Science	Belgium	Belgium	Activity level monitoring	Video, 2D camera	/	Feature variable	Pen	IT development	Finishers	Animal measure	Activity	Behavioural	/	/	/	General	Real-time	0	0	0	0	0	0	0	1	0	1	0	0	0	0	0	0
25	45	Automatic monitoring of pig locomotion using image analysis	2014	Livestock Science	Belgium	Belgium	Monitor number of pigs in locomotion	Video, 2D camera	/	Feature variable	Pen	IT development	Weaners, Finishers	Animal measure	Locomotion	Behavioural	/	/	/	General	Real-time	0	0	0	1	0	0	1	1	0	1	0	0	0	0	0	0
26	62	Automatic weight estimation of individual pigs using image analysis	2014	Computers and Electronics in Agriculture	Belgium	Belgium	Weight estimation	Video, 2D camera	/	Feature variable	Individual	IT development and validation	Weaners, Finishers	Animal measure	Corpus area	Physiological	/	/	/	General	Real-time	1	1	0	1	0	0	1	1	0	1	0	0	0	0	0	0
27	102	Pressure mat analysis of naturally occurring lameness in young pigs after weaning	2014	BMC Veterinary Analysis	Netherlands	Netherlands	Lameness detection	Pressure mat	/	Target Variable	Individual	IT development	Weaners	Animal measure	Asymmetry indices of limbs	Behavioural	/	/	/	Lameness	Real-time	0	0	0	0	0	0	0	1	1	0	0	0	0	0	0	0
28	103	Using classification trees to detect induced sow lameness with a transient model	2014	Animal	USA	USA	Lameness detection	Force plate	Pressure mat	Target Variable	Individual	IT development	Individual sows	Animal measure	Weight distribution	Behavioural	Animal measure	Gait measures	Behavioural	Lameness	Real-time	0	0	0	0	0	0	0	1	1	0	0	0	0	0	0	0
29	98	Validation of a high frequency radio frequency identification (HF RFID) system for registering feeding patterns of growing-finishing pigs	2014	Computers and Electronics in Agriculture	Belgium	Belgium	Feeding pattern registration	HF RFID antennas and ear tags	/	Feature variable	Individual	IT development	Weaners, Finishers	Animal measure	Feeder visits	Behavioural	/	/	/	General	Real-time	1	1	0	0	0	0	0	1	0	1	0	0	0	0	0	0
30	84	Vocalization data mining for estimating swine stress conditions	2014	Engenharia Agricola	Brazil	Brazil	Stress vocalisation classification	Sound, microphone	/	Feature variable	Pen	IT development	Finishers	Animal measure	Vocalisation	Behavioural	/	/	/	Hunger,thirst and thermal stress	Real-time	1	1	1	1	0	1	0	0	0	0	0	0	0	0	0	0
31	92	Classification of nest-building behaviour in non-crated farrowing sows on the basis of accelerometer data	2015	Biosystems Engineering	Austria	Austria	Nest-building behaviour classificaiton	Accelerometer (Ear tag)	/	Feature variable	Individual	IT development and validation	Lactating sows (loose-housed)	Animal measure	Activity	Behavioural	/	/	/	Farrowing management	Real-time	0	0	0	0	0	0	0	1	0	1	0	1	0	1	0	0
32	58	Development of automatic surveillance of animal behaviour and welfare using image analysis and machine learned segmentation technique	2015	Animal	Sweden	Sweden	Pig position	Video, 2D camera	/	Feature variable	Pen	IT development	Finishers	Animal measure	Position	Behavioural	/	/	/	Thermal environmental control	Real-time	0	0	0	1	0	1	0	0	0	0	0	0	0	0	0	0
33	76	Discerning pig screams in production environments	2015	PLoS ONE	Belgium	Belgium	Scream classification	Sound, microphone	/	Feature variable	Pen	IT development	Weaners, Finishers	Animal measure	Scream	Behavioural	/	/	/	Social stress	Real-time	0	0	0	0	0	0	0	0	0	0	0	1	0	0	0	1
34	46	Pig herd monitoring and undesirable tripping and stepping prevention	2015	Computers and Electronics in Agriculture	Denmark	Denmark	Tripping and stepping prevention	Video, 2D camera, optical flow	/	Feature variable	Batch	IT development	Abattoir	Animal measure	Activity (optical flow)	Behavioural	/	/	/	Tripping, stepping (truck unloading)	Real-time	0	0	0	0	0	0	0	1	1	0	0	0	0	0	0	0
35	67	Pre-clinical and clinical walking kinematics in female breeding pigs with lameness: A nested case-control cohort study	2015	Veterinary Journal	UK	UK	Lameness prediction	Video, 3D camera	/	Target Variable	Individual	IT development	Gilts (pre-breeding until 3 weanings)	Animal measure	Gait measures	Behavioural	/	/	/	Lameness	Real-time	0	0	0	0	0	0	0	1	1	0	0	0	0	0	0	0
36	104	Towards qualitative and quantitative prediction and detection of parturition onset in sows using light barriers	2015	Computers and Electronics in Agriculture	Germany	Germany	Parturition onset prediction and detection (crated)	Light barriers	/	Feature variable	Individual	IT development and validation	Lactating sows (crated)	Animal measure	Activity	Behavioural	/	/	/	Farrowing management	Real-time	0	0	0	0	0	0	0	1	0	1	0	0	0	0	0	0
37	59	Using machine vision for investigation of changes in pig group lying patterns	2015	Computers and Electronics in Agriculture	UK	UK, Germany	Lying pattern and location	Video, 2D camera	/	Feature variable	Pen	IT development	Finishers	Animal measure	Lying pattern and location	Behavioural	/	/	/	Thermal environmental control	Real-time	0	0	0	1	0	1	0	0	0	0	0	0	0	0	0	0
38	56	Automatic detection of mounting behaviours among pigs using image analysis	2016	Computers and Electronics in Agriculture	UK	UK, Germany	Mounting behaviour detection	Video, 2D camera	/	Feature variable	Pen	IT development	Finishers	Animal measure	Mounting	Behavioural	/	/	/	Negative social behaviour	Real-time	0	0	0	0	0	0	0	1	1	0	0	1	1	0	0	0
39	65	Automatic recognition of aggressive behavior in pigs using a kinect depth sensor	2016	Sensors	Korea	Korea	Aggressive behaviour recognition	Video, 3D camera	/	Feature variable	Pen	IT development	Weaners	Animal measure	Aggression	Behavioural	/	/	/	Social stress	Real-time	0	0	0	0	0	0	0	1	1	0	0	1	1	0	0	0
40	38	Automatic recognition of lactating sow behaviors through depth image processing	2016	Computers and Electronics in Agriculture	USA	China	Activity behaviour monitoring	Image, 3D camera	/	Feature variable	Individual	IT development and validation	Lactating sows (crated)	Animal measure	Lying, sitting, standing, kneeling, feeding, drinking, and shifting	Behavioural	/	/	/	General	Real-time	1	1	1	1	0	0	1	1	0	1	0	0	0	0	0	0
41	93	Can an automated labelling method based on accelerometer data replace a human labeller? - Postural profile of farrowing sows	2016	Computers and Electronics in Agriculture	Austria	Austria, Belgium	Posture classification	Accelerometer (Ear tag)	/	Feature variable	Individual	IT development	Lactating sows	Animal measure	Active, resting sternal, resting lateral	Behavioural	/	/	/	General	Real-time	0	0	0	1	0	0	1	1	0	1	0	0	0	0	0	0
42	109	Feasibility of boar taint classification using a portable Raman device	2016	Meat Science	Germany	China, Germany	Boar taint classification	Portable Raman device	/	Target Variable	Individual	IT development	Boars/Abattoir	Animal measure	Androsterone, Skatole	Physiological	/	/	/	Castration	/	0	0	0	0	0	0	0	1	0	0	1	0	0	0	0	0
43	97	Measuring the drinking behaviour of individual pigs housed in group using radio frequency identification (RFID)	2016	Animal	Belgium	Belgium	Drinking behaviour measurement	HF RFID antennas and ear tags	/	Feature variable	Individual	IT development	Weaners, Finishers	Animal measure	Drinking duration and frequency	Behavioural	/	/	/	General	Real-time	1	0	1	0	0	0	0	1	0	1	0	0	0	0	0	0
44	99	Methods to construct feeding visits from RFID registrations of growing-finishing pigs at the feed trough	2016	Computers and Electronics in Agriculture	Belgium	Belgium	Feeder visit construction	HF RFID antennas and ear tags	/	Feature variable	Individual	IT development and validation	Weaners, Finishers	Animal measure	Feeder visits	Behavioural	/	/	/	General	Real-time	1	1	0	0	0	0	0	1	0	1	0	0	0	0	0	0
45	47	Monitoring pig movement at the slaughterhouse using optical flow and modified angular histograms	2016	Biosystems Engineering	Denmark	Denmark	Abnormal movement detection (too slow or too quick)	Video, 2D camera, optical flow	/	Feature variable	Batch	IT development	Abattoir	Animal measure	Activity (optical flow)	Behavioural	/	/	/	Injury and disease at the abattoir/herd	Both	0	0	0	0	0	0	0	1	1	1	0	0	0	0	0	0
46	40	Pig dimension detection system based on depth image	2016	Transactions of the Chinese Society for Agricultural Machinery	China	China	Body dimension detection	Image, 3D camera	HF RFID antennas and ear tags	Feature variable	Individual	IT development and validation	Finishers	Animal measure	Pig contour	Physiological	/	/	/	General	Real-time	1	1	0	1	0	0	1	1	0	1	0	0	0	0	0	0
47	94	Porcine lie detectors: Automatic quantification of posture state and transitions in sows using inertial sensors	2016	Computers and Electronics in Agriculture	UK	UK	Posture classification and posture change quantification	Accelerometer (Hind end)	/	Feature variable	Individual	IT development	Lactating sows (crated)	Animal measure	Standing, sitting, lying	Behavioural	Animal measure	Postural changes	Behavioural	Farrowing management	Real-time	0	0	0	0	0	0	0	1	0	1	0	0	0	0	0	0
48	95	Predicting farrowing of sows housed in crates and pens using accelerometers and CUSUM charts	2016	Computers and Electronics in Agriculture	Finland	Finland	Farrowing prediction (crated and loose-housed)	Accelerometer (Neck collar)	/	Target Variable	Individual	IT development	Lactating sows (crated and loose-housed)	Animal measure	Activity	Behavioural	/	/	/	Farrowing management	Real-time	0	0	0	0	0	0	0	1	0	1	0	0	0	0	0	0
49	12	Temperature as a predictor of fouling and diarrhea in slaughter pigs	2016	Livestock Science	Denmark	Denmark	Pen fouling and diarrhea prediction	Thermometer	/	Target Variable	Pen	IT development and validation	Finishers	Environmental measure	Pen temperature	/	/	/	/	Pen fouling, Diarrhea	Real-time	0	0	0	1	1	1	0	1	0	1	0	0	0	0	0	0
50	13	A multivariate dynamic linear model for early warnings of diarrhea and pen fouling in slaughter pigs	2017	Computers and Electronics in Agriculture	Denmark	Denmark	Pen fouling and diarrhea prediction	Thermometer	Water flow-meter	Target Variable	Pen	IT development and validation	Finishers	Environmental measure	Pen temperature, humidity	/	Animal measure	Water use, activation frequency, feed amount	Behavioural	Pen fouling, Diarrhea	Real-time	0	0	0	1	1	1	0	1	0	1	0	0	0	0	0	0
51	28	A new approach for categorizing pig lying behaviour based on a Delaunay triangulation method	2017	Animal	UK	UK, Germany	Room temperature classification	Image, 2D camera	/	Both	Batch	IT development	Finishers	Animal measure	Lying pattern (close, normal, far)	Behavioural	/	/	/	Thermal environmental control	Real-time	0	0	0	1	0	1	0	0	0	0	0	0	0	0	0	0
52	64	Automated tracking to measure behavioural changes in pigs for health and welfare monitoring	2017	Scientific Reports	UK	UK	Activity type monitoring	Video, 3D camera	/	Feature variable	Pen	IT development	Weaners, Finishers	Animal measure	Standing, feeding, locomotion	Behavioural	/	/	/	General	Real-time	1	1	0	1	0	0	1	1	0	1	0	0	0	0	0	0
53	105	Evaluation and characterisation of Passive Infrared Detectors to monitor pig activities in an environmental research building	2017	Biosystems Engineering	USA	USA	Activity monitoring	Passive Infrared Detector (PID)	/	Feature variable	Batch	IT development	Weaners, Finishers	Animal measure	Activity	Behavioural	/	/	/	General	Real-time	0	0	0	0	0	0	0	1	0	1	0	0	0	0	0	0
54	51	Image motion feature extraction for recognition of aggressive behaviors among group-housed pigs	2017	Computers and Electronics in Agriculture	China	China	Aggressive behaviour recognition	Video, 2D camera	/	Feature variable	Pen	IT development	Weaners	Animal measure	Aggression (acceleration)	Behavioural	/	/	/	Social stress	Real-time	0	0	0	0	0	0	0	1	1	0	0	1	1	0	0	0
55	77	Online detection and localisation of piglet crushing using vocalisation analysis and context data	2017	Computers and Electronics in Agriculture	Germany	Germany	Piglet crushing detection and localisation	Sound, microphone	/	Target Variable	Pen	IT development	Piglets	Animal measure	Stress vocalisation (screams)	Behavioural	/	/	/	Piglet crushing	Real-time	0	0	0	0	0	0	0	1	1	1	0	0	0	0	0	0
56	21	Prediction of carbon dioxide concentration in weaned piglet buildings by wavelet neural network models	2017	Computers and Electronics in Agriculture	Spain	Spain	Carbon dioxide concentration prediction	Weather station	/	Feature variable	Batch	IT development	Weaners	Environmental measure	Temperature, RH, Air velocity, CO2	/	Animal measure	Activity circadian rythnm	Behavioural	Air quality	Real-time	0	0	0	0	0	0	0	1	0	1	0	0	0	0	0	0
57	54	Recognition and drinking behaviour analysis of individual pigs based on machine vision	2017	Livestock Science	China	China	Drinking behaviour detection and drinking pig recognition	Video, 2D camera	/	Feature variable	Individual	IT development	Weaners, Finishers	Animal measure	Drinker visit	Behavioural	/	/	/	General	Real-time	1	0	1	0	0	0	0	1	0	1	0	0	0	0	0	0
58	60	Using automated image analysis in pig behavioural research: Assessment of the influence of enrichment substrate provision on lying behaviour	2017	Applied Animal Behaviour Science	UK	UK, Germany	Lying behaviour measurement	Video, 2D camera	/	Feature variable	Pen	IT development	Finishers	Animal measure	Lying position	Behavioural	/	/	/	General	Real-time	0	0	0	1	0	1	0	1	0	1	0	0	0	0	0	0
59	106	Agreement between passive infrared detector measurements and human observations of animal activity	2018	Livestock Science	Spain	Spain	Actitivy monitoring	Passive Infrared Detector (PID)	/	Feature variable	Pen	IT development	Weaners	Animal measure	Activity	Behavioural	/	/	/	General	Real-time	0	0	0	0	0	0	0	1	0	1	0	0	0	0	0	0
60	43	Asphyxia occurrence detection in sows during the farrowing phase by inter-birth interval evaluation	2018	Computers and Electronics in Agriculture	China	China	Asphyxia occurence detection	Image, 3D camera	/	Target Variable	Individual	IT development	Lactating sows (crated)	Animal measure	Inter-birth interval, number of piglets	Physiological	/	/	/	Asphyxia in sows	Real-time	0	0	0	0	0	0	0	1	0	1	0	0	0	0	0	0
61	69	Automatic early warning of tail biting in pigs: 3D cameras can detect lowered tail posture before an outbreak	2018	PLoS ONE	UK	UK	Tail posture detection	Video, 3D camera	/	Feature variable	Pen	IT development	Weaners, Finishers	Animal measure	Tail posture	Behavioural	/	/	/	Tail biting	Real-time	0	0	0	0	0	0	0	1	1	0	0	1	1	0	0	0
62	39	Automatic recognition of lactating sow postures from depth images by deep learning detector	2018	Computers and Electronics in Agriculture	China	China	Posture and posture changes recognition	Image, 3D camera	/	Feature variable	Individual	IT development	Lactating sows (loose-housed)	Animal measure	Posture	Behavioural	/	/	/	General / Piglet crushing	Real-time	0	0	0	1	0	0	1	1	1	1	0	0	0	0	0	0
63	90	Design and test of a low-power acceleration sensor with Bluetooth Low Energy on ear tags for sow behaviour monitoring	2018	Biosystems Engineering	China	China, USA	Activity monitoring	Accelerometer (Ear tag, long battery)	/	Feature variable	Individual	IT development	Lactating sows (loose-housed)	Animal measure	Resting, movement, feeding	Behavioural	/	/	/	General	Real-time	1	1	0	1	0	0	1	1	0	1	0	0	0	0	0	0
64	107	Estimation of patterns in weaned piglets' activity using spectral analysis	2018	Biosystems Engineering	Spain	Spain	Activity pattern estimation	Passive Infrared Detector (PID)	/	Feature variable	Pen	IT development	Weaners	Animal measure	Activity	Behavioural	/	/	/	General	Real-time	0	0	0	0	0	0	0	1	0	1	0	0	0	0	0	0
65	41	Evaluation of a depth sensor for mass estimation of growing and finishing pigs	2018	Biosystems Engineering	USA	Brazil	Weight estimation	Image, 3D camera	/	Feature variable	Individual	IT development	Weaners, Finishers	Animal measure	Pig volume	Physiological	/	/	/	General	Real-time	1	1	0	1	0	0	1	1	0	1	0	0	0	0	0	0
66	100	Monitoring trough visits of growing-finishing pigs with UHF-RFID	2018	Computers and Electronics in Agriculture	Germany	Germany	Feed trough visit monitoring	UHF-RFID antennas and ear tags	/	Feature variable	Individual	IT development	Finishers	Animal measure	Trough visit bouts	Behavioural	/	/	/	General	Real-time	1	1	0	0	0	0	0	1	0	1	0	0	0	0	0	0
67	101	Online warning systems for individual fattening pigs based on their feeding pattern	2018	Biosystems Engineering	Belgium	Belgium	Warning system based on feeding pattern	HF RFID antennas and ear tags	/	Target Variable	Individual	IT development and validation	Weaners, Finishers	Animal measure	Feeder visit duration and interval	Behavioural	/	/	/	Disease, body injuries, low growth	Real-time	1	1	0	0	0	0	0	1	1	1	0	0	0	0	0	0
68	85	The use of vocalization signals to estimate the level of pain in piglets	2018	Engenharia Agricola	Brazil	Brazil	Pain level estimation / Pain vocalisation classification	Sound, microphone	/	Feature variable	Laboratory	IT development	Piglets	Animal measure	Vocalisation	Behavioural	/	/	/	Pain	Real-time	0	0	0	0	0	0	0	1	0	0	1	0	0	0	0	0
69	87	Use of vocalisation to identify sex, age, and distress in pig production	2018	Biosystems Engineering	Brazil	Brazil	Distress condition identification	Sound, microphone	/	Feature variable	Laboratory	IT development	Piglets, Weaners, Finishers	Animal measure	Vocalisation	Behavioural	/	/	/	Stress	Real-time	0	0	0	0	0	0	0	0	0	0	0	1	0	0	0	1
70	15	Validation of an AutoRegressive Integrated Moving Average model for the prediction of animal zone temperature in a weaned piglet building	2018	Biosystems Engineering	Spain	Spain	Animal zone temperature prediction	Thermometer	Air speed transmitter	Feature variable	Batch	IT validation	Weaners	Environmental measure	Outdoor temperatur, outlet section area, volume of extracted air, former indoor temperature	/	Animal measure	Weight	Physiological	Thermal environmental control	Real-time	0	0	0	1	0	1	0	0	0	0	0	0	0	0	0	0
71	48	Automated Individual Pig Localisation, Tracking and Behaviour Metric Extraction Using Deep Learning	2019	IEEE Access	UK	UK	Localisation, tracking and behaviour extraction	Video, 2D camera	/	Feature variable	Individual	IT development	/	Animal measure	Pig movement	Behavioural	/	/	/	General	Real-time	0	0	0	0	0	0	0	1	0	1	0	0	0	0	0	0
72	29	Automatic scoring of lateral and sternal lying posture in grouped pigs using image processing and Support Vector Machine	2019	Computers and Electronics in Agriculture	Germany, Sweden	Germany	Sternal and lateral lying posture scoring	Image, 2D camera	/	Feature variable	Pen	IT development	Weaners, Finishers	Animal measure	Lying posture	Behavioural	/	/	/	Thermal environmental control	Real-time	0	0	0	1	0	1	0	0	0	0	0	0	0	0	0	0
73	86	Classification of piglet (Sus Scrofa) stress conditions using vocalization pattern and applying paraconsistent logic Et	2019	Computers and Electronics in Agriculture	Brazil	Brazil	Stress vocalisation classification	Sound, microphone	/	Feature variable	Pen	IT development	Piglets, Weaners	Animal measure	Vocalisation	Behavioural	/	/	/	Pain, cold/heat, hunger, thirst	Real-time	1	1	1	1	0	1	0	1	1	0	0	0	0	0	0	0
74	22	Deep learning and machine vision approaches for posture detection of individual pigs	2019	Sensors	Germany, Sweden	Germany	Posture detection in group-housed pigs	Image, 2D camera	/	Feature variable	Pen	IT development	Weaners, Finishers	Animal measure	Standing, sternal lying, lateral lying	Behavioural	/	/	/	General	Real-time	0	0	0	1	0	1	0	1	0	1	0	0	0	0	0	0
75	37	Development and application of an image acquisition system for characterizing sow behaviors in farrowing stalls	2019	Computers and Electronics in Agriculture	USA	USA	Posture and behaviour monitoring	Image, 3D camera	/	Feature variable	Individual	IT development	Lactating sows (crated)	Animal measure	Standing, sitting, kneeling, lying sternal, lying lateral	Behavioural	Animal measure	Feeding, drinking, posture changes	Behavioural	General	Real-time	1	1	1	0	0	0	0	1	0	1	0	0	0	0	0	0
76	18	Establishment of validated models for non-invasive prediction of rectal temperature of sows using infrared thermography and chemometrics	2019	International Journal of Biometeorology	China	China	Rectal temperature measurement	Infrared thermography	Thermometer, anemometer	Feature variable	Individual	IT development	Individual sows	Animal measure	Surface temperature	Physiological	Environmental measure	Temperature, RH, wind speed	/	Disease, heat stress	Real-time	0	0	0	1	0	1	0	1	0	1	0	0	0	0	0	0
77	16	Estimation of thermal comfort indexes for production animals using multiple linear regression models	2019	Journal of Animal Behaviour and Biometeorology	Brazil	Brazil	Thermal comfort index estimation	Thermometer	/	Feature variable	Batch	IT development and validation	/	Environmental measure	Outdoor dry bulb temperature and RH	/	/	/	/	Thermal environmental control	Real-time	0	0	0	1	0	1	0	0	0	0	0	0	0	0	0	0
78	91	Freedom to lie: How farrowing environment affects sow lying behaviour assessment using inertial sensors	2019	Computers and Electronics in Agriculture	UK	UK	Activity and activity transition classification	Accelerometer (x2, neck and rear end)	/	Feature variable	Individual	IT development	Lactating sows (loose-housed)	Animal measure	Walking, standing, sitting, sternal lying, lateral lying, feeding	Behavioural	Animal measure	Activity transition	Behavioural	General, Farrowing management	Real-time	1	1	0	1	0	0	1	1	1	1	0	0	0	0	0	0
79	17	Fuzzy system to evaluate performance and the physiological responses of piglets raised in the farrowing house with different solar heating systems	2019	Revista Facultad Nacional de Agronomia Medellin	Brazil	Brazil	Weight gain, rectal temp, surface temp and resp rate evaluation	Thermometer	/	Feature variable	Pen	IT development	Piglets	Environmental measure	Creep temperature and RH	/	/	/	/	Thermal environmental control	Real-time	0	0	0	1	0	1	0	0	0	0	0	0	0	0	0	0
80	19	Learning patterns from time-series data to discriminate predictions of tail-biting, fouling and diarrhoea in pigs	2019	Computers and Electronics in Agriculture	Denmark	UK	Tail biting, pen fouling and diarrhea prediction	Water flow-meter	Thermometer	Target Variable	Pen	IT development and validation	Finishers	Animal measure	Water intake	Behavioural	Environmental measure	Pen temp, room temp, RH, ventilation, heating and cooling output	/	Tail biting, Pen fouling, Diarrhea	Real-time	0	0	0	1	1	1	0	1	1	1	0	1	1	0	0	0
81	34	On-Farm claw scoring in sows using a novel mobile device	2019	Sensors	Belgium	Belgium	Claw scoring	Image, 2D Camera	/	Feature variable	Individual	IT development	Gestation sows	Animal measure	Claw lesion	Physiological	/	/	/	Claw lesions, Lameness	Real-time	0	0	0	0	0	0	0	1	1	0	0	0	0	0	0	0
82	63	Practical Monitoring of Undergrown Pigs for IoT-Based Large-Scale SmartFarm	2019	IEEE Access	South Korea	South Korea	Undergrown pig detection	Video, 2D camera	/	Target Variable	Pen	IT development	Finishers	Animal measure	Relative pig size (area)	Physiological	/	/	/	Undergrown pigs	Real-time	1	1	0	0	0	0	0	1	0	1	0	0	0	0	0	0
83	14	Prediction of tail biting events in finisher pigs from automatically recorded sensor data	2019	Animals	Denmark	Denmark	Tail biting prediction	Water flow-meter	Thermometer	Target Variable	Pen	IT development and validation	Finishers	Animal measure	Water intake and activation freq	Behavioural	Environmental measure	Pen temperature	/	Tail biting	Real-time	0	0	0	0	0	0	0	1	1	0	0	1	1	0	0	0
84	32	Semi-automatic pig weight estimation using digital image analysis	2019	Applied Engineering in Agriculture	Thailand	Thailand	Weight estimation	Image, 2D camera	/	Feature variable	/	IT development	Finishers	Animal measure	Pig boundary	Physiological	/	/	/	General	Real-time	1	1	0	1	0	0	1	1	0	1	0	0	0	0	0	0
85	112	Spatial modeling of pigs' drinking patterns as an alarm reducing method I. Developing a multivariate dynamic linear model	2019	Computers and Electronics in Agriculture	Denmark	Denmark	Drinking pattern modelling	Water flow-meter	/	Feature variable	Pen	IT development	Weaners, Finishers	Animal measure	Water intake	Behavioural	/	/	/	Undesirable events	Real-time	1	0	1	1	1	1	0	1	0	1	0	0	0	0	0	0
86	111	Spatial modeling of pigs' drinking patterns as an alarm reducing method II. Application of a multivariate dynamic linear model	2019	Computers and Electronics in Agriculture	Denmark	Denmark	Pen fouling and diarrhea prediction	Water flow-meter	/	Target Variable	Pen, Batch	IT development	Weaners, Finishers	Animal measure	Water intake	Behavioural	/	/	/	Fouling, Diarrhea	Real-time	0	0	0	1	1	1	0	1	0	1	0	0	0	0	0	0
87	35	Tailception': Using neural networks for assessing tail lesions on pictures of pig carcasses	2019	Animal	Germany	Germany	Tail lesion and tail loss scoring	Image, 2D camera	/	Feature variable	Individual	IT development	Abattoir	Animal measure	Tail lesion, tail length	Physiological	/	/	/	Tail biting	Retrospectively	0	0	0	0	0	0	0	1	1	0	0	1	1	0	0	0
88	57	A computer vision approach for recognition of the engagement of pigs with different enrichment objects	2020	Computers and Electronics in Agriculture	Austria	China, Belgium	Object engagement detection	Video, 2D camera	/	Feature variable	Pen	IT development and validation	Finishers	Animal measure	Object engagement	Behavioural	/	/	/	Enrichment provision	Real-time	0	0	0	0	0	0	0	0	0	0	0	1	0	1	0	1
89	61	A computer vision-based method for spatial-temporal action recognition of tail-biting behaviour in group-housed pigs	2020	Biosystems Engineering	Austria	China, Belgium	Tail-biting recognition	Video, 2D camera	/	Target Variable	Pen	IT development	Finishers	Animal measure	Tail biting	Behavioural	/	/	/	Tail biting	Real-time	0	0	0	0	0	0	0	1	1	0	0	1	1	0	0	0
90	33	An adaptive pig face recognition approach using Convolutional NeuralNetworks	2020	Computers and Electronics in Agriculture	China	UK	Face recognition	Image, 2D camera	/	Feature variable	Individual	IT development and validation	Lactating sows (crated)	Animal measure	Face and eye	Physiological	/	/	/	General	Real-time	1	0	0	0	0	0	0	0	0	0	0	1	0	0	0	1
91	49	Automated video behavior recognition of pigs using two-stream convolutional networks	2020	Sensors	China	China	Activity type recognition	Video, 2D camera	/	Feature variable	Pen	IT development	/	Animal measure	Feeding, lying, walking, scratching, mounting	Behavioural	/	/	/	General	Real-time	1	1	0	1	0	0	1	1	0	1	0	1	1	1	0	0
92	68	Automatic posture change analysis of lactating sows by actionlocalisation and tube optimisation from untrimmed depth videos	2020	Biosystems Engineering	China	China	Posture and posture changes recognition	Video, 3D camera	/	Feature variable	Individual	IT development and validation	Lactating sows (loose-housed)	Animal measure	Standing, sitting, lateral lying, sternal lying	Behavioural	/	/	/	General / Piglet crushing	Real-time	0	0	0	1	0	0	1	1	1	1	0	0	0	0	0	0
93	30	Automatically detecting pig position and posture by 2D camera imagingand deep learning	2020	Computers and Electronics in Agriculture	Germany	Germany	Pig position and posture detection	Image, 2D camera	/	Feature variable	Pen	IT development and validation	Weaners, Finishers	Animal measure	Position, posture (lying, not lying)	Behavioural	/	/	/	General	Real-time	0	0	0	1	0	1	0	1	0	1	0	0	0	0	0	0
94	55	Classification of drinking and drinker-playing in pigs by a video-based deep learning method	2020	Biosystems Engineering	USA	China, Belgium	Drinking and drinker-playing behaviour classification	Video, 2D camera	/	Feature variable	Pen	IT development and validation	Weaners	Animal measure	Drinking, drinker-playing	Behavioural	/	/	/	General	Real-time	1	0	1	0	0	0	0	1	0	1	0	1	0	1	0	0
95	96	Dynamics of Sows' Activity Housed in Farrowing Pens with Possibility ofTemporary Crating might Indicate the Time When Sows Should be Confinedin a Crate before the Onset of Farrowing	2020	Animals	Austria	Austria	Farrowing and crating alarm	Accelerometer (eat tag and antennas)	/	Target Variable	Individual	IT development and validation	Lactating sows	Animal measure	Activity	Behavioural	/	/	/	Farrowing management	Real-time	0	0	0	1	0	0	1	1	0	1	0	0	0	0	0	0
96	36	Evaluation of an automated assessment system for ear and tail lesions as animal welfare indicators in pigs at slaughter	2020	Meat Science	Germany	Germany	Ear and tail leasion scoring	Image, 2D camera	/	Feature variable	Individual	IT development	Abattoir	Animal measure	Ear lesion, tail lesion	Physiological	/	/	/	Ear biting, Tail biting	Retrospectively	0	0	0	0	0	0	0	1	1	0	0	1	1	0	0	0
97	50	Predicting pen fouling in fattening pigs from pig position	2020	Livestock Science	Denmark	Denmark	Pen fouling prediction	Video, 2D camera	/	Target Variable	Pen	IT development and validation	Finishers	Animal measure	Pig position, activity	Behavioural	/	/	/	Pen fouling	Real-time	0	0	0	1	1	1	0	0	0	0	0	0	0	0	0	0
98	66	Quantifying defence cascade responses as indicators of pig affect and welfare using computer vision methods	2020	Scientific Reports	UK	UK	Defence cascade response quantification	Video, 3D camera	Load platform	Feature variable	Laboratory	IT development	Weaners, Finishers	Animal measure	Startle magnitude, freeze duration/occurence	Behavioural	/	/	/	Negative affective state	Real-time	0	0	0	0	0	0	0	0	0	0	0	1	0	0	0	1
99	52	Recognition of aggressive episodes of pigs based on convolutional neural network and long short-term memory	2020	Computers and Electronics in Agriculture	USA	China/Belgium	Aggressive behaviour recognition	Video, 2D camera	/	Feature variable	Pen	IT development	Weaners	Animal measure	Aggressive behaviour	Behavioural	/	/	/	Weaning stress, Social stress	Real-time	0	0	0	0	0	0	0	1	1	0	0	1	1	0	0	0
100	42	Research on 3D surface reconstruction and body size measurement of pigs based on multi-view RGB-D cameras	2020	Computers and Electronics in Agriculture	China	China	Body size measurement	Image, 3D camera	/	Feature variable	Laboratory	IT development	Finishers	Animal measure	Body length, width, height and abdominal girth	Physiological	/	/	/	General	Real-time	1	1	0	1	0	0	1	1	0	1	0	0	0	0	0	0
101	108	Using Passive Infrared Detectors to Record Group Activity and Activityin Certain Focus Areas in Fattening Pigs	2020	Animals	Germany	Germany	Group activity measurement in specific areas of the pen	Passive Infrared Detector (PID)	/	Feature variable	Pen	IT development	Finishers	Animal measure	Activity	Behavioural	/	/	/	General	Real-time	1	1	1	0	0	0	0	1	0	1	0	1	0	1	0	0
